# Supplementary material for: Metallomesogens with extended bent tridentate receptors: columnar and cubic mesomorphism tuned by the size of the lanthanide metal ionsElectronic supplementary information (ESI) available: experimental procedures and characterization (elemental analyses, NMR, ESI-MS, conductivity) for L3, L3-C4 and L4 and for the complexes [Zn(L1)(NO3)2]·DMF (1), [Zn(Li)(NO3)2]·3H2O (i = 2: 2; i = 4: 3), [Zn(L3)(NO3)2]·H2O (4) and [Ln(L3)(NO3)3] (Ln = Eu, 5; Ln = Dy, 6; Ln = Lu, 7). Tables collecting selected bond distances and bite angles for 1 and L3-C4 and scattering vectors for 5–7. Figures showing intermolecular interactions in 1 and L3-C4, DSC traces for 2, 4 and 6 , birefringent textures for L3 and 7 and a CPK modeling for 7. See http://www.rsc.org/suppdata/dt/b2/b211902a/
Source: Royal Society of Chemistry journal article supplement (doi:10.1039/b211902a), 2003-02-03

Table S1 Selected bond lengths [ $\text{\AA}$ ] and bond angles [ $^\circ$ ] in  $[\text{Zn}(\text{L1})(\text{NO}_3)_2]\cdot\text{DMF}$  (**1**).<sup>a</sup>

|           |           |            |           |
|-----------|-----------|------------|-----------|
| Zn-N1     | 2.134 (3) | N2-Zn-N4   | 151.2 (1) |
| Zn-N4     | 2.119 (3) | N2-Zn-O1b  | 103.7 (1) |
| Zn-O1b    | 2.043 (3) | N4-Zn-O1b  | 96.3 (1)  |
| Zn-N2     | 2.097 (3) | N1-Zn-O1b  | 132.9 (1) |
| Zn-O1a    | 2.077 (3) | N2-Zn-O1a  | 98.5 (1)  |
| N1-Zn-N2  | 75.5 (1)  | N4-Zn-O1a  | 102.9 (1) |
| N1-Zn-O1a | 139.3 (1) | O1a-Zn-O1b | 87.7 (1)  |
| N1-Zn-N4  | 75.6 (1)  |            |           |

<sup>a</sup> See Fig.1 for the numbering scheme

Table S2 Observed and calculated scattering vectors for  $[\text{Eu}(\text{L3})(\text{NO}_3)_3]$  (**5**) in the  $\text{Cub}_v$  mesophase at  $170^\circ\text{C}$  (space group  $Im\bar{3}$ ,  $Ia\bar{3}$  or  $Im\bar{3}m$ ,  $a = 38.0 \text{ \AA}$ ,  $V = 54870 \text{ \AA}^3$ ).

| $d_{obs}$ | Intensity | $hkl$ | $h^2+k^2+l^2$ | $d_{calc}$ |
|-----------|-----------|-------|---------------|------------|
| 26.8      | vs        | 110   | 2             | 26.9       |
| 19.0      | s         | 200   | 4             | 19.0       |
| 15.5      | s         | 211   | 6             | 15.5       |
| 13.5      | m         | 220   | 8             | 13.4       |
| 11.95     | m         | 310   | 10            | 12.0       |
| 4.5       | broad     |       |               |            |

Table S3 Observed and calculated scattering vectors for [Dy(L3)(NO<sub>3</sub>)<sub>3</sub>] (6) in the Cub<sub>v</sub> mesophase at 165°C (space group  $Im\bar{3}$ ,  $Ia\bar{3}$  or  $Im\bar{3}m$ ,  $a = 37.9 \text{ \AA}$ ,  $V = 54440 \text{ \AA}^3$ ).

| $d_{obs}$ | Intensity | $hkl$ | $h^2+k^2+l^2$ | $d_{calc}$ |
|-----------|-----------|-------|---------------|------------|
| 26.75     | vs        | 110   | 2             | 26.8       |
| 19.0      | s         | 200   | 4             | 18.95      |
| 15.6      | s         | 211   | 6             | 15.5       |
| 13.4      | m         | 220   | 8             | 13.4       |
| 12.0      | s         | 310   | 10            | 12.0       |
| 10.9      | vw        | 222   | 12            | 10.95      |
| 10.1      | w         | 321   | 14            | 10.1       |
| 4.5       | broad     |       |               |            |

Table S4 Observed and calculated scattering vectors for [Lu(L3)(NO<sub>3</sub>)<sub>3</sub>] (7) in the Col<sub>h</sub> mesophase at 165°C (plane groups  $p6$  or  $p6mm$ ,  $a = 31.2 \text{ \AA}$ ,  $S = 842 \text{ \AA}^2$ ).

| $d_{obs}$ | Intensity | $hk$ | $h^2+k^2+hk$ | $d_{calc}$ |
|-----------|-----------|------|--------------|------------|
| 27.1      | vs        | 10   | 1            | 27.0       |
| 15.6      | s         | 11   | 3            | 15.6       |
| 13.5      | s         | 20   | 4            | 13.5       |
| 10.2      | m         | 21   | 7            | 10.2       |
| 9.0       | m         | 30   | 9            | 9.0        |
| 7.8       | m         | 22   | 12           | 7.8        |
| 7.5       | m         | 31   | 13           | 7.5        |
| 4.5       | broad     |      |              |            |

Table S5 Selected bond lengths [ $\text{\AA}$ ], bond and dihedral angles [ $^\circ$ ] in L3-C4.<sup>a</sup>

|                |           |                |           |
|----------------|-----------|----------------|-----------|
| C43-C44        | 1.489(7)  | C1-C6          | 1.484(6)  |
| C43-O7         | 1.203(8)  | C15-O2         | 1.203(7)  |
| C43-O6         | 1.360(6)  | O1-C15         | 1.363(5)  |
| O6-C37         | 1.414(6)  | C9-O1          | 1.415(5)  |
| C5-C34         | 1.478(8)  | C15-C16        | 1.492(6)  |
| C44-C43-O6     | 111.0(5)  | O1-C15-C16     | 110.8(4)  |
| C43-O6-C37     | 120.2(4)  | C9-O1-C15      | 120.0(4)  |
| N1-C1-C6-N2    | 148.4(5)  | N1-C5-C34-N4   | 137.6(4)  |
| C6-N3-C13-C14  | -99.5(6)  | C34-N5-C41-C42 | 107.4(6)  |
| C8-C9-O1-C15   | -61.1(7)  | C36-C37-O6-C43 | -54.8(7)  |
| C9-O1-C15-C16  | -177.8(5) | C37-O6-C43-C44 | -177.9(5) |
| O1-C15-C16-C17 | 3.7(7)    | O6-C43-C44-C45 | -174.7(5) |

<sup>a</sup> See figure below for the numbering scheme.

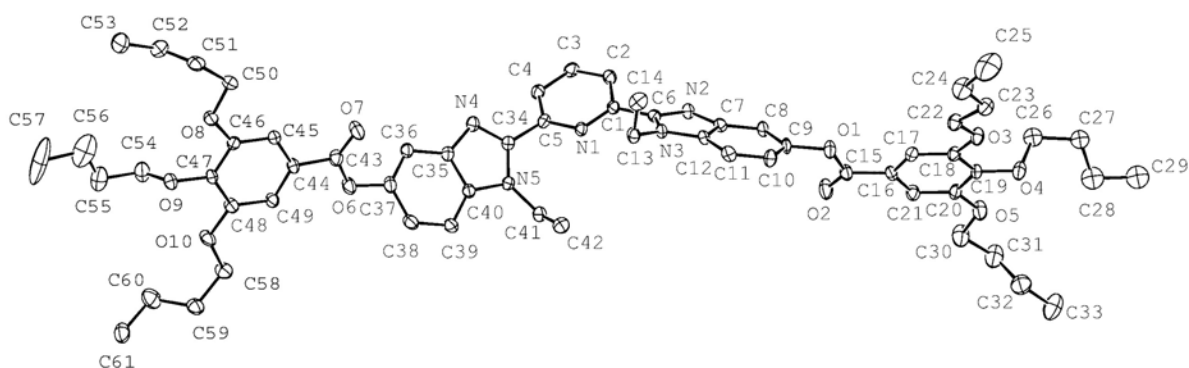

Supplement: b211902a-2.pdf [file b211902a-2.pdf]
