# Supplementary material for: Metallomesogens with extended bent tridentate receptors: columnar and cubic mesomorphism tuned by the size of the lanthanide metal ionsElectronic supplementary information (ESI) available: experimental procedures and characterization (elemental analyses, NMR, ESI-MS, conductivity) for L3, L3-C4 and L4 and for the complexes [Zn(L1)(NO3)2]·DMF (1), [Zn(Li)(NO3)2]·3H2O (i = 2: 2; i = 4: 3), [Zn(L3)(NO3)2]·H2O (4) and [Ln(L3)(NO3)3] (Ln = Eu, 5; Ln = Dy, 6; Ln = Lu, 7). Tables collecting selected bond distances and bite angles for 1 and L3-C4 and scattering vectors for 5–7. Figures showing intermolecular interactions in 1 and L3-C4, DSC traces for 2, 4 and 6 , birefringent textures for L3 and 7 and a CPK modeling for 7. See http://www.rsc.org/suppdata/dt/b2/b211902a/
Source: Royal Society of Chemistry journal article supplement (doi:10.1039/b211902a), 2003-02-03
Supplement: b211902a-3.pdf [file b211902a-3.pdf]

Figure S1 Stereoview of the four  $[\text{Zn}(\text{L1})(\text{NO}_3)_2]$  complexes ( $(x, y, z)$ ,  $(1-x, \frac{1}{2}+y, \frac{3}{2}-z)$ ,  $(-x, 1-y, 1-z)$ ,  $(x-1, y, z)$ ) involved in intermolecular  $\pi$ -stacking interactions occurring along the  $[10\bar{6}]$  direction.

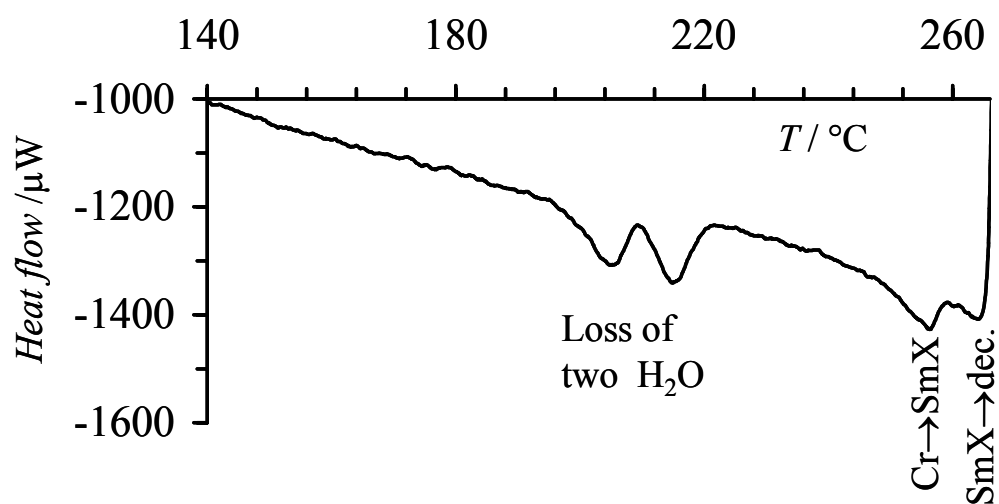

Figure S2 DSC trace of  $[\text{Zn}(\text{L2})(\text{NO}_3)_2] \cdot 3\text{H}_2\text{O}$  (**2**) (first heating,  $5^\circ\text{C} \cdot \text{min}^{-1}$  under  $\text{N}_2$ ).

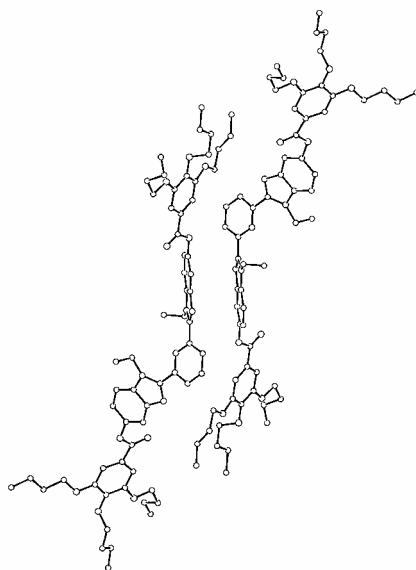

Figure S3 View of the two L3-C4 molecules (( $x, y, z$ ), ( $1-x, 2-y, 2-z$ )) involved in intermolecular  $\pi$ -stacking interactions between the parallel benzimidazole rings.

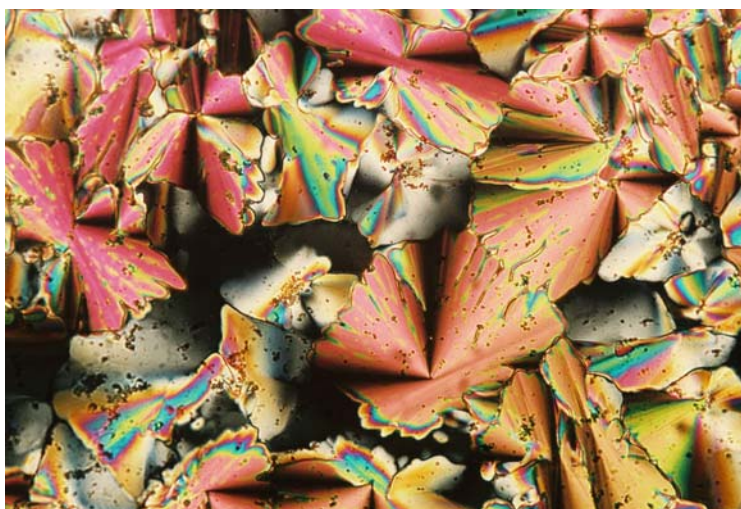

Figure S4 Birefringent texture observed for L3 in its columnar phase at 61.7°C (0.85 x 0.54 mm<sup>2</sup>, objective Leitz 20x /0.40, crossed polariser and analyzer).

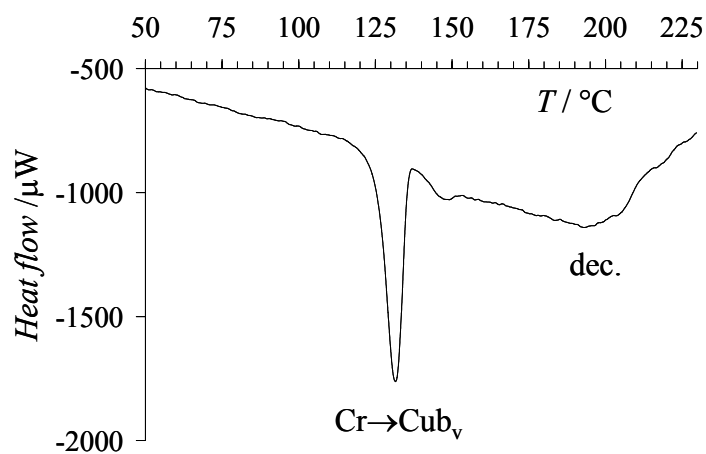

Figure S5 DSC trace of [Zn(L3)(NO<sub>3</sub>)<sub>2</sub>] $\cdot$ H<sub>2</sub>O (**4**) (second heating, 5°C $\cdot$ min<sup>-1</sup> under N<sub>2</sub>).

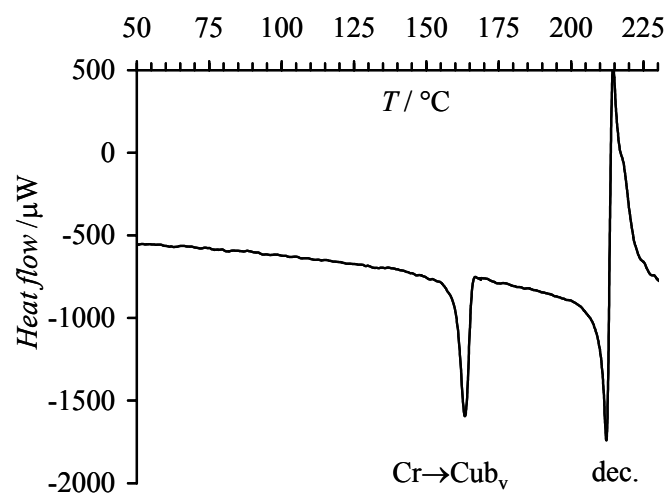

Figure S6 DSC trace of  $[\text{Dy}(\text{L3})(\text{NO}_3)_3]$  (**6**) (first heating,  $5^\circ\text{C}\cdot\text{min}^{-1}$  under  $\text{N}_2$ ).

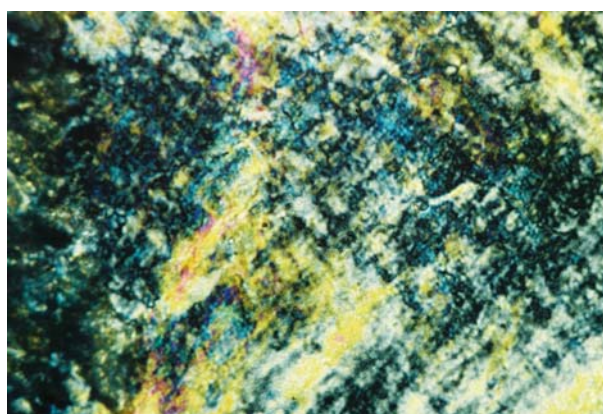

Figure S7 Birefringent texture observed for  $[\text{Lu}(\text{L3})(\text{NO}_3)_3]$  (**7**) in its  $\text{Col}_h$  phase at  $175^\circ\text{C}$  ( $0.85 \times 0.54 \text{ mm}^2$ , objective Leitz 20x /0.40, crossed polariser and analyzer).

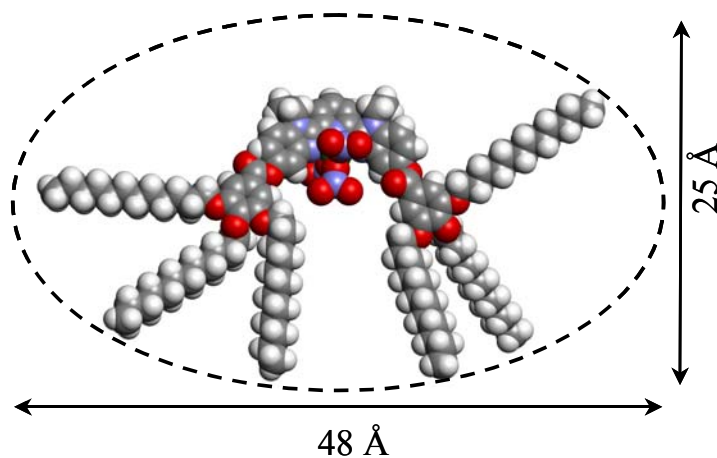

Figure S8 Computer CPK modeling of the complex  $[\text{Lu}(\text{L3})(\text{NO}_3)_3]$  (**7**) based on the crystal structures of L3-C4 and  $[\text{Lu}(\text{L2-C1})(\text{NO}_3)_3]$ .<sup>8</sup>
